# Supplementary material
Source: Springer Nature journal article supplement (https://www.springermedizin.de/resource/supplementary/13002_2009_194_MOESM5_ESM.pdf/9627356)

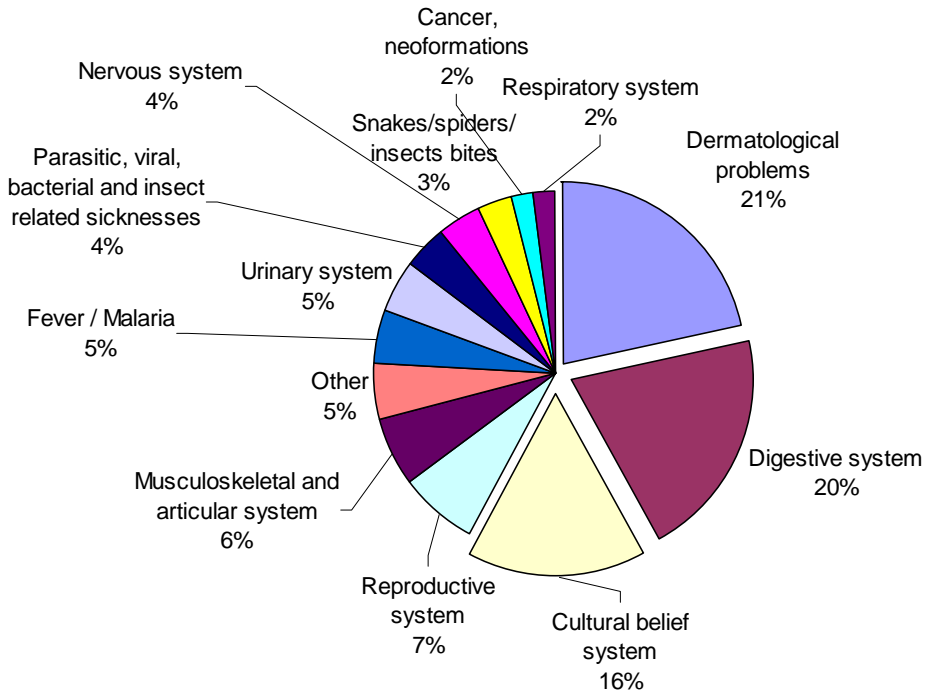

Supplement: MOESM5 [file 9627356]
